# Supplementary material
Source: PubMed Central journal article supplement (PMC2930679)

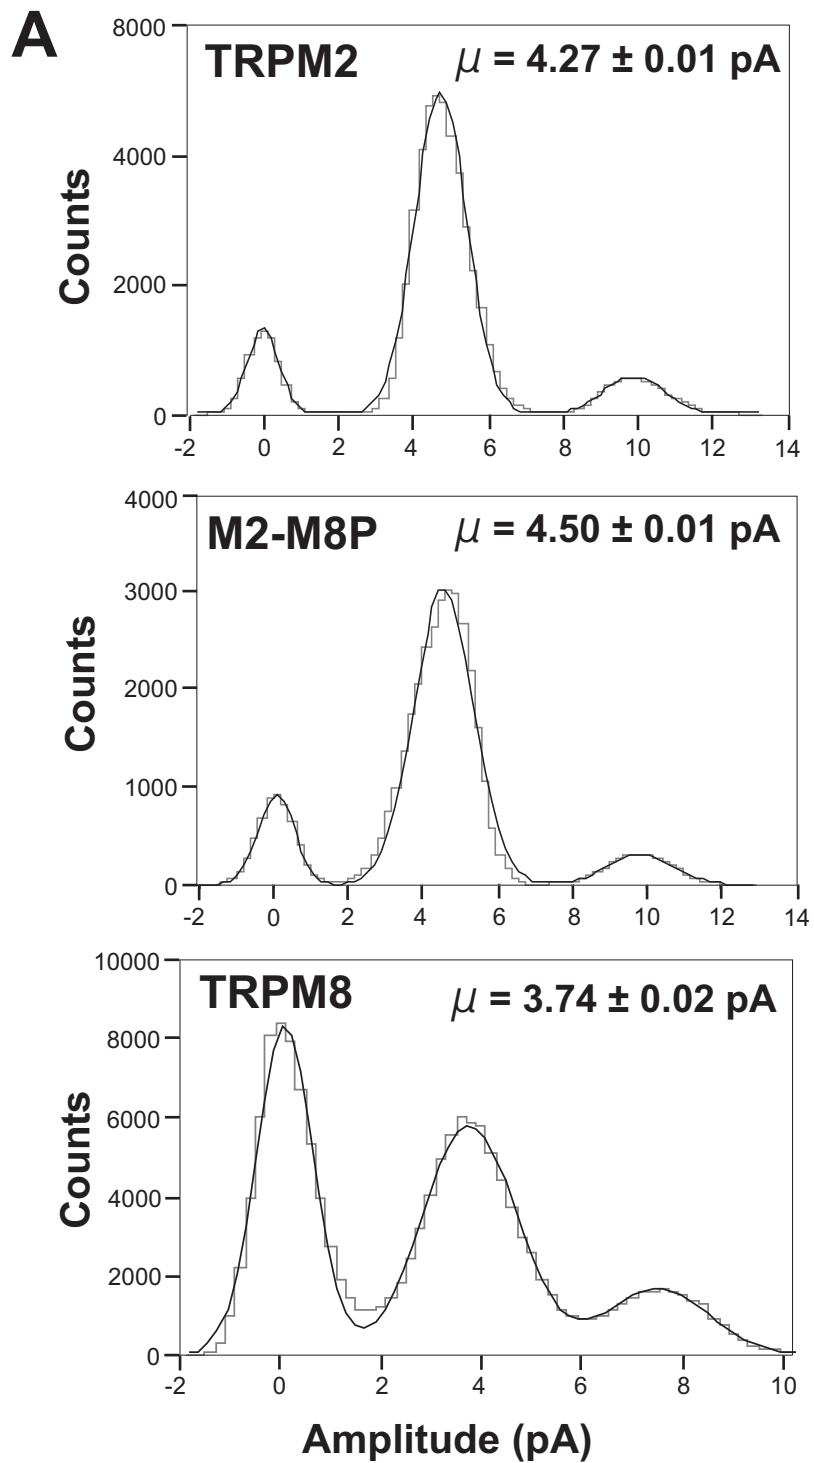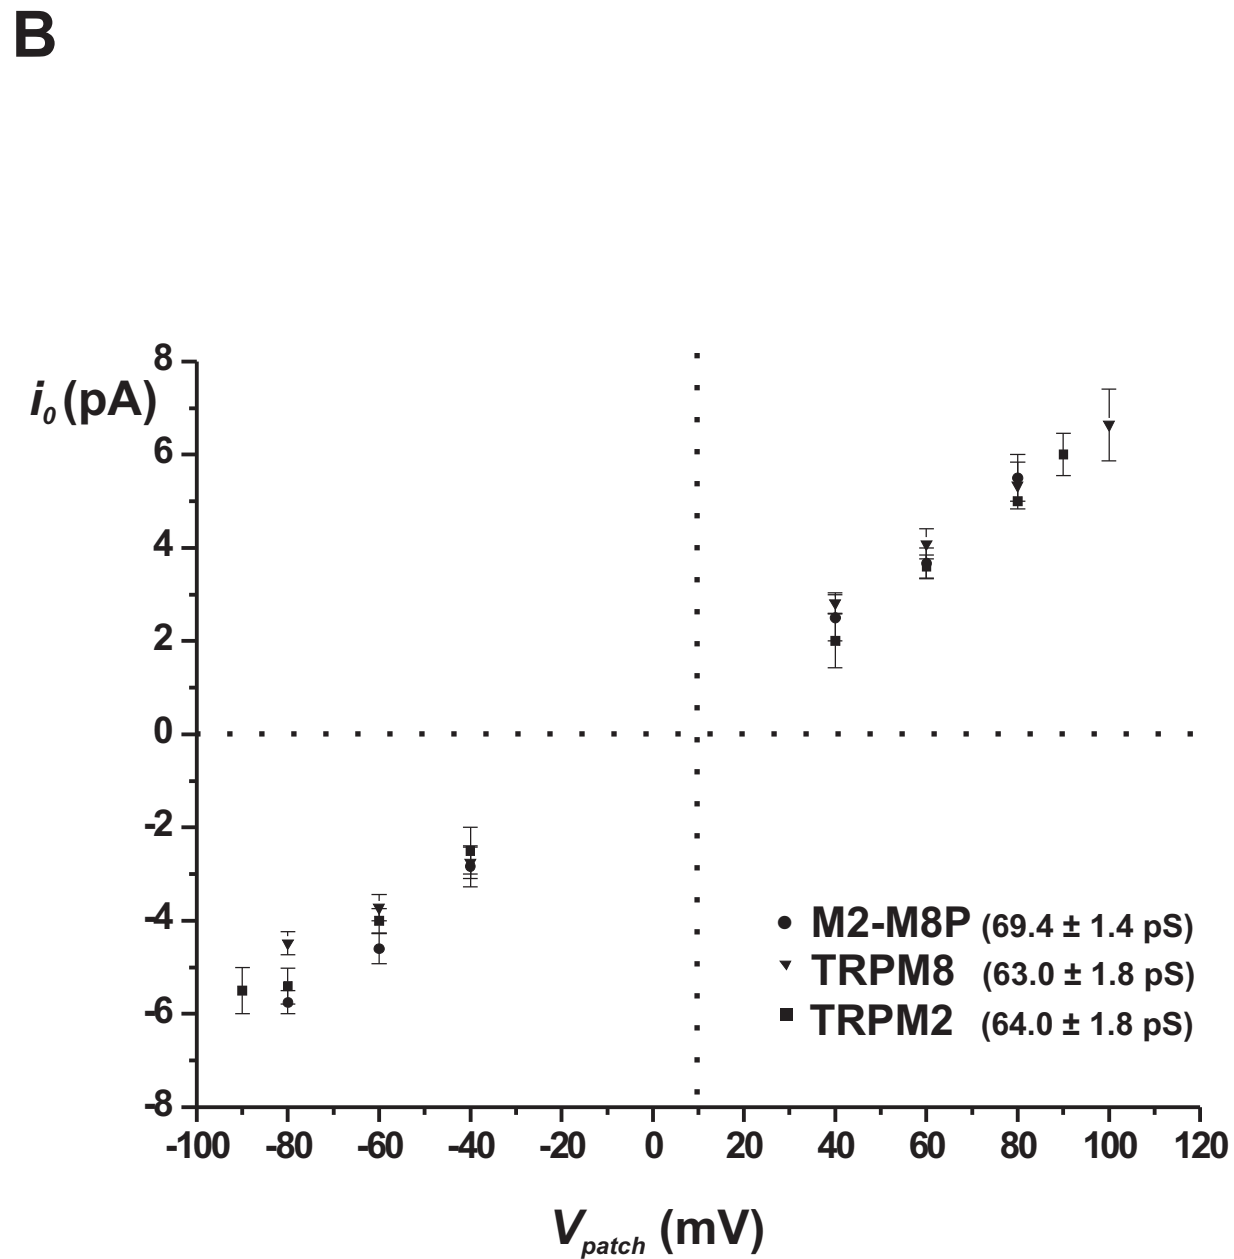

Figure S1

Supplement: supp_M110.109975_fig1.pdf [file supp_M110.109975_fig1.pdf]

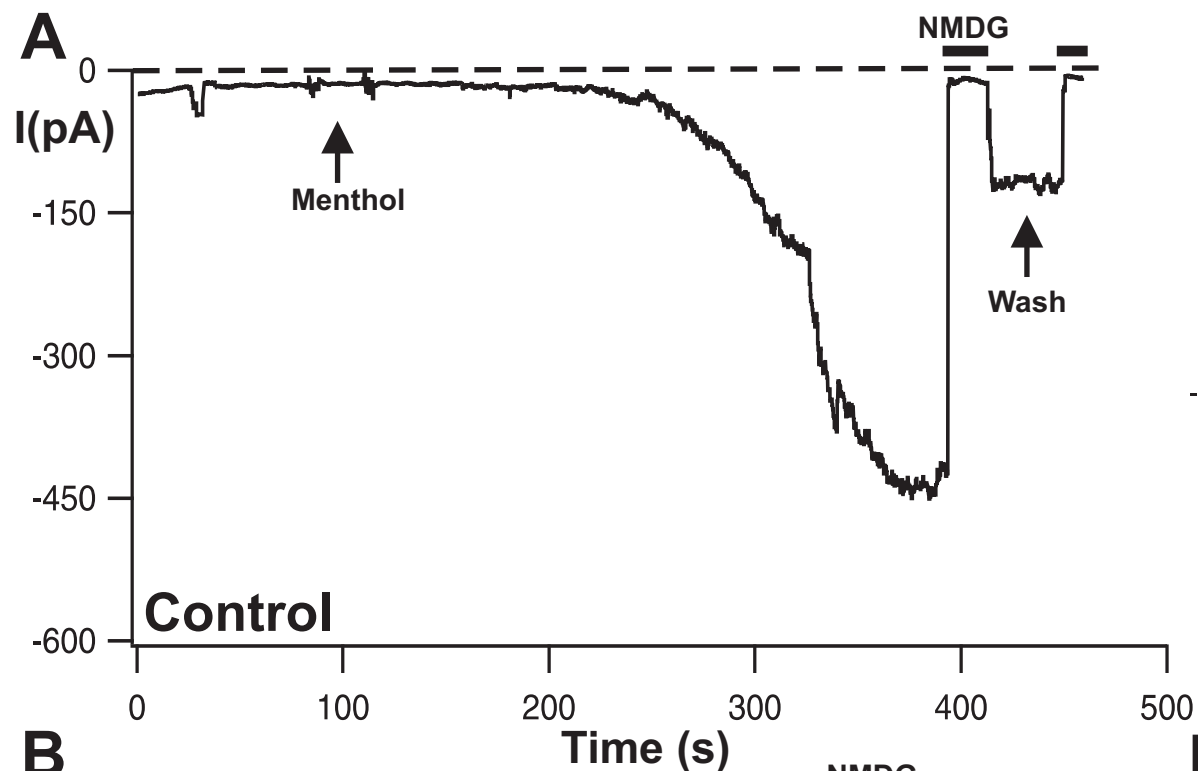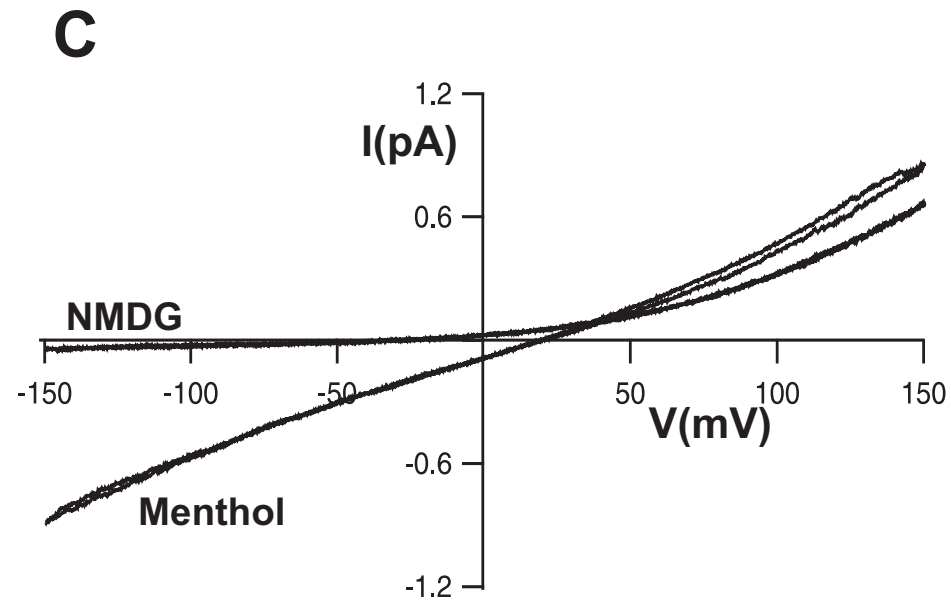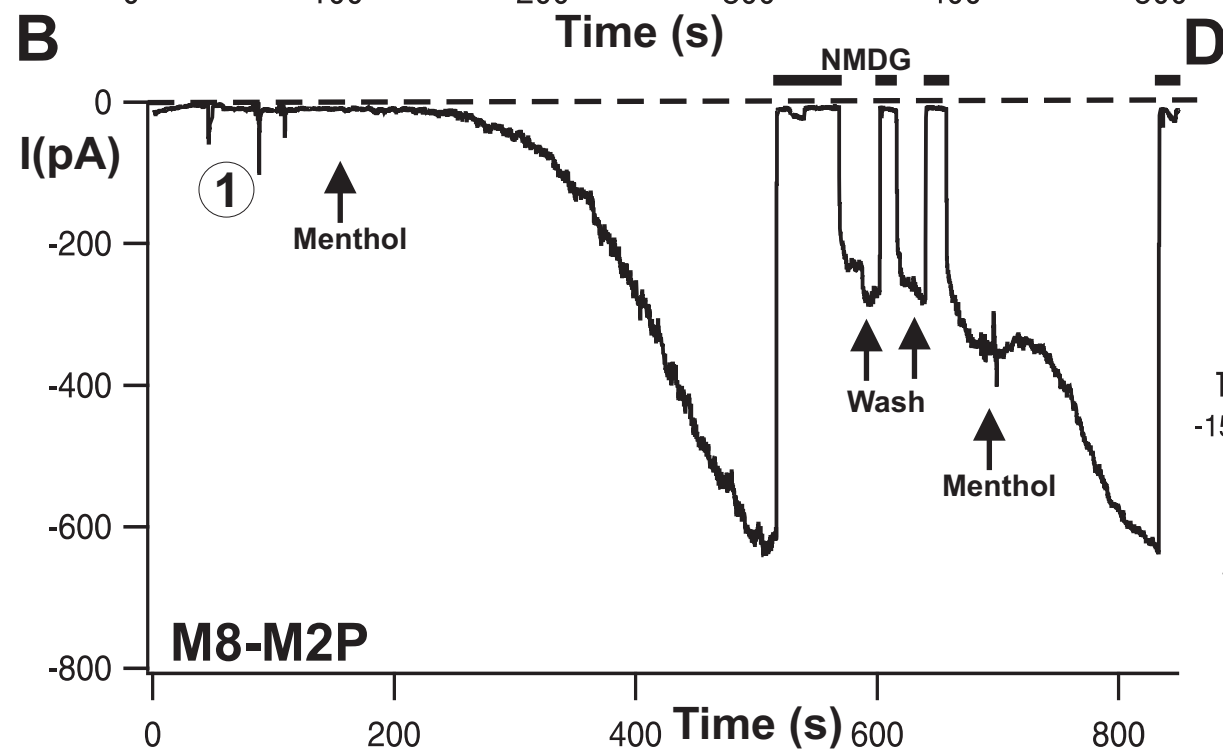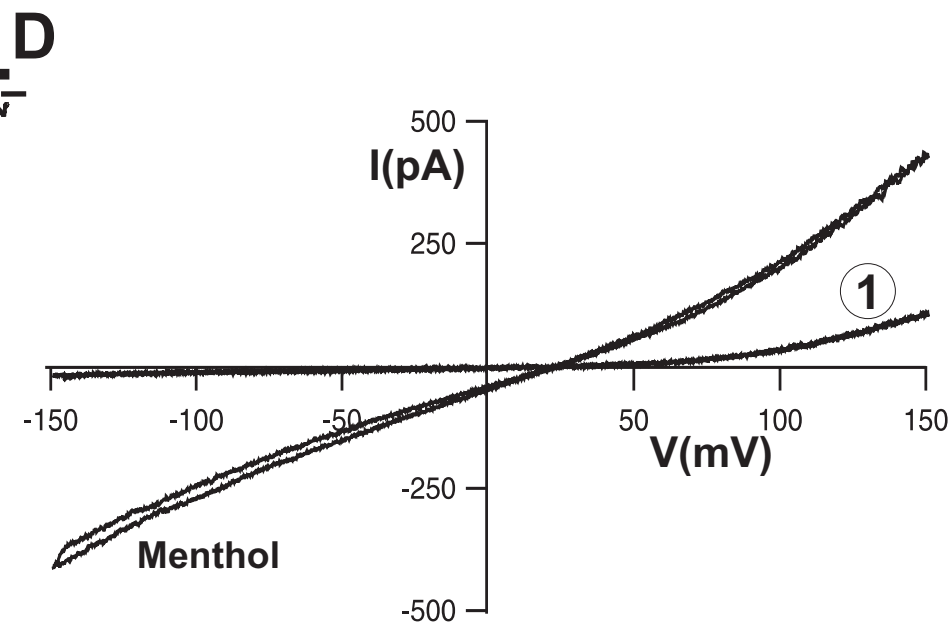

Figure S2

Supplement: supp_M110.109975_fig2.pdf [file supp_M110.109975_fig2.pdf]
